# Supplementary material for: Plant extract-based liquid phase exfoliation enables one-step green production of two-dimensional heterostructure nanohybrids capable of dramatic improvement in polymer properties
Source: Royal Society of Chemistry journal article supplement (doi:10.1039/d3gc04448c), 2024-01-01
Supplement: d3gc04448c1.pdf [file d3gc04448c1.pdf]

**Plant Extract-Based Liquid Phase Exfoliation Enables One-Step Green Production of  
Two-Dimensional Heterostructure Nanohybrids Capable of Dramatic Improvement of  
Polymer Properties**

Yingjie Bu, Rhudith B. Cabulong, Beom Soo Kim\*

Department of Chemical Engineering, Chungbuk National University, Cheongju, Chungbuk  
28644, Republic of Korea

\*Corresponding author E-mail: [bskim@chungbuk.ac.kr](mailto:bskim@chungbuk.ac.kr)

**Table S1. Summary of hybrid composites reported in the literature.**

| No. | Hybrid type                                            | Precursor materials                   | Preparation method                                     | Application                                | Reference |
|-----|--------------------------------------------------------|---------------------------------------|--------------------------------------------------------|--------------------------------------------|-----------|
| 1   | Aluminum-h-BN-GNP                                      | H-BN and graphene                     | ultrasonic dispenser for 1 h                           | Automotive and aerospace applications      | 1         |
| 2   | Aluminum alloys-h-BN-GNP                               | h-BN and graphite                     | Hummer's method                                        | Corrosion protection                       | 2         |
| 3   | GO/BN hybrid membranes                                 | GO and amino groups functionalized BN | heated to 80 °C for 2 h                                | Electronic devices heat transfer materials | 3         |
| 4   | Mxene-PSZ-ABN                                          | Mxene and h-BN                        | crosslinked at 160 °C for 12 h                         | Thermally conductive materials             | 4         |
| 5   | Graphene/BNN                                           | Graphene and BNN                      | stirring and sonication                                | Sensor                                     | 5         |
| 6   | f-BNNS-Ti <sub>3</sub> C <sub>2</sub> Tx/PBI composite | Functionalized BNN and Mxene          | ball milling and thermal reaction                      | Thermal conductivity                       | 6         |
| 7   | RGO-h-BN/STG                                           | h-BN and RGO                          | ultrasonication, ball grinding and quartz tube reactor | Thermal transport performance              | 7         |
| 8   | Graphene/h-BN                                          | BNN and graphite                      | CVD method (graphene growth on the BNN surface)        | Oxygen reduction reaction                  | 8         |
| 9   | EP/GNS/BNO H aerogel                                   | BNOH and GO                           | mixing and thermal reaction                            | Thermal insulation                         | 9         |
| 10  | GO/BNN PVA film                                        | GO and BNN                            | stirred at room temperature for 3 days                 | Thermal conductive polymers                | 10        |
| 11  | Epoxy/graphene/boron nitride                           | Graphene and BN                       | ultrasonication for 1 h                                | High thermal conductivity material         | 11        |
| 12  | Polystyrene-BNN-graphene                               | BNN and graphene                      | sonication for 1 h                                     | Thermal conductive                         | 12        |

| No. | hybrid type                | Precursor materials             | Preparation method                               | Application                                     | Reference |
|-----|----------------------------|---------------------------------|--------------------------------------------------|-------------------------------------------------|-----------|
| 13  | Borophene-graphene aerogel | Borophene and GO                | mixing individual materials                      | Sensors                                         | 13        |
| 14  | Mxene/GO                   | GO and Mxene                    | mixing GO with Mxene at room temperature for 6 h | Supercapacitors                                 | 14        |
| 15  | Graphene/BNN               | Graphene and BNN                | sonication and hydrothermal treatment            | Insulating composites                           | 15        |
| 16  | Mxene/BNN                  | Mxene and BNN                   | sonication for 20 min                            | Electronic devices                              | 16        |
| 17  | BNN/GO                     | BNN and GO                      | mixed                                            | Electronic systems                              | 17        |
| 18  | Graphene/Mxene             | GO and Mxene                    | mixed                                            | Flexible electronics                            | 18        |
| 19  | EP/BN-PDA-MXene composites | BNN and Mxene                   | stirring for 24 h                                | Fireproof material                              | 19        |
| 20  | BNN/GO                     | GO and BNN                      | ball-milled for 8 h                              | Battery                                         | 20        |
| 21  | TPU/BNN/GO                 | GO and BNN                      | oxidized BN was reacted with grafted GO          | H <sub>2</sub> gas barrier coating applications | 21        |
| 22  | Silicone rubber/BNN/GO     | Functionalized BNN and graphene | sonication for 1 h                               | Thermally conductive                            | 22        |
| 23  | GO/graphene film           | GO and graphene                 | stirred for 24 h                                 | Flexible device                                 | 23        |
| 24  | BNOH-GNP/TPU Hybrid        | NaOH modified BNN and graphene  | mixed                                            | Wearable cooled smart clothes                   | 24        |
| 25  | BNN/FFG                    | h-BN and graphite               | sonication for 24 h using tannic acid            | Biocompatible                                   | 25        |

**First day**

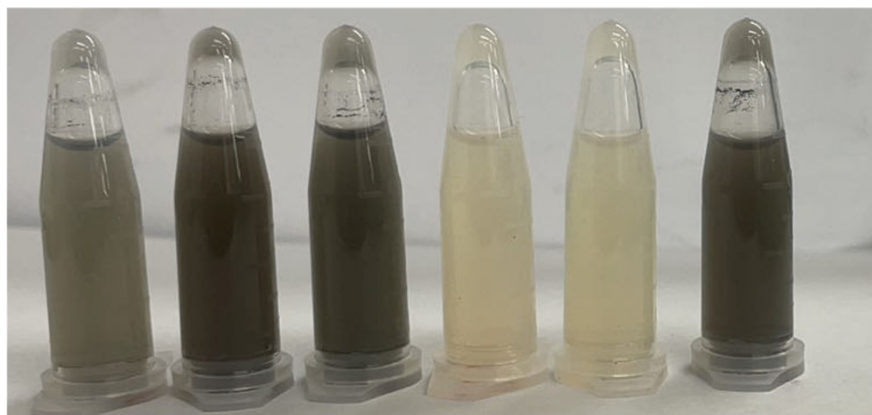

**After 20 days**

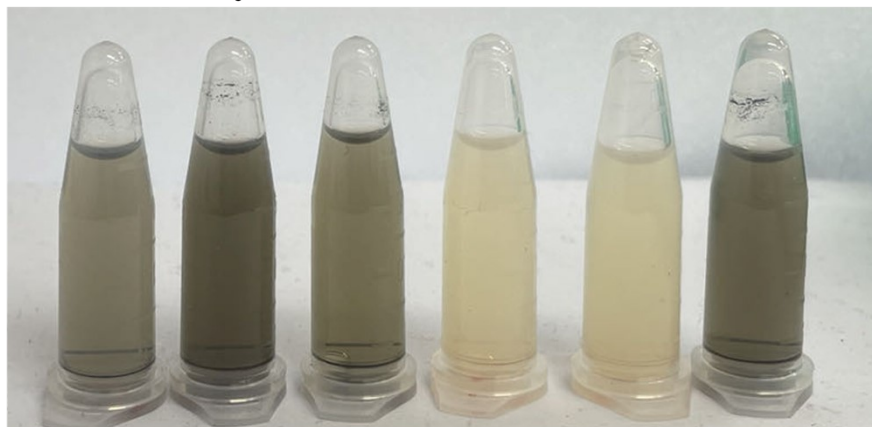

**(a) (b) (c) (d) (e) (f)**

**Fig. S1.** Digital picture of sample (a) BNN/FFG; (b) FFG/FFB; (c) FFG/MXene; (d) BNN/FFB; (e) BNN/MXene; and (f) FFB/MXene liquid stored water dispersions after sonication.

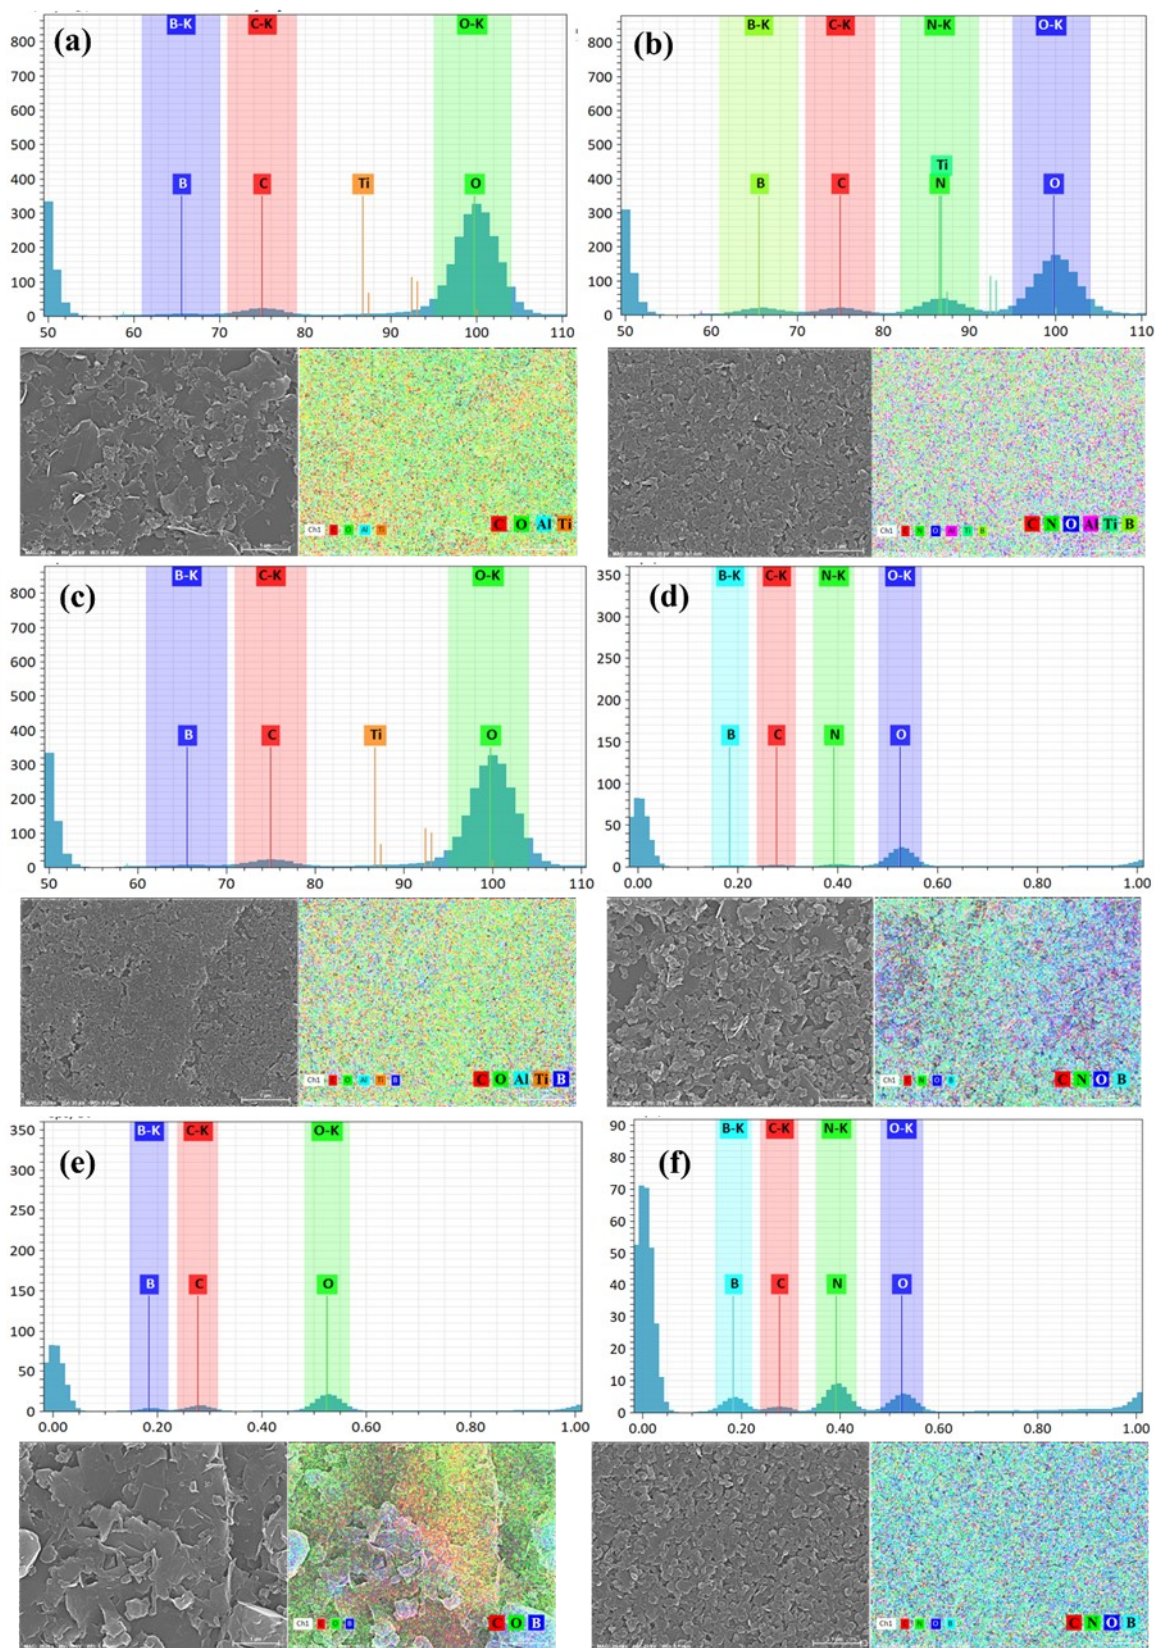

**Fig. S2.** EDS analysis of (a) FFG/MXene, (b) BNN/MXene, (c) FFB/MXene, (d) BNN/FFG, (e) FFG/FFB, and (f) BNN/FFB.

**Table S2. Elemental composition of hybrids through EDS analysis.**

| Sample    | Atomic % |       |       |       |      |      |
|-----------|----------|-------|-------|-------|------|------|
|           | C        | O     | B     | N     | Al   | Ti   |
| FFG/MXene | 24.81    | 73.03 |       |       | 0.34 | 1.82 |
| BNN/MXene | 13.59    | 34.53 | 35.96 | 15.04 | 0.06 | 0.82 |
| FFB/MXene | 16.51    | 59.36 | 22.3  |       | 0.35 | 1.48 |
| BNN/FFG   | 13.82    | 45.4  | 28.86 | 11.92 |      |      |
| FFG/FFB   | 33.85    | 30.1  | 36.05 |       |      |      |
| BNN/FFB   | 10.51    | 13.75 | 44.35 | 31.39 |      |      |

**Table S3. Elemental composition of nanomaterials and hybrids through XPS analysis.**

| Sample    | Atomic % |       |       |       |      |       |
|-----------|----------|-------|-------|-------|------|-------|
|           | C        | O     | B     | N     | Al   | Ti    |
| FFG       | 78.18    | 21.82 |       |       |      |       |
| BNN       | 47.07    | 19.03 | 15.16 | 18.74 |      |       |
| MXene     | 42       | 36.58 |       |       | 1.08 | 20.34 |
| FFB       | 45.92    | 35.98 | 18.10 |       |      |       |
| BNN/FFG   | 19.64    | 38.49 | 25.85 | 16.02 |      |       |
| BNN/FFB   | 40.25    | 18.37 | 18.79 | 22.6  |      |       |
| FFG/MXene | 70.19    | 28.07 |       |       |      | 1.74  |
| BNN/MXene | 34.86    | 18.67 | 19.95 | 25.81 |      | 0.71  |
| FFG/FFB   | 83.00    | 11.24 | 5.77  |       |      |       |
| FFB/MXene | 46.26    | 37.9  | 12.98 |       |      | 2.86  |



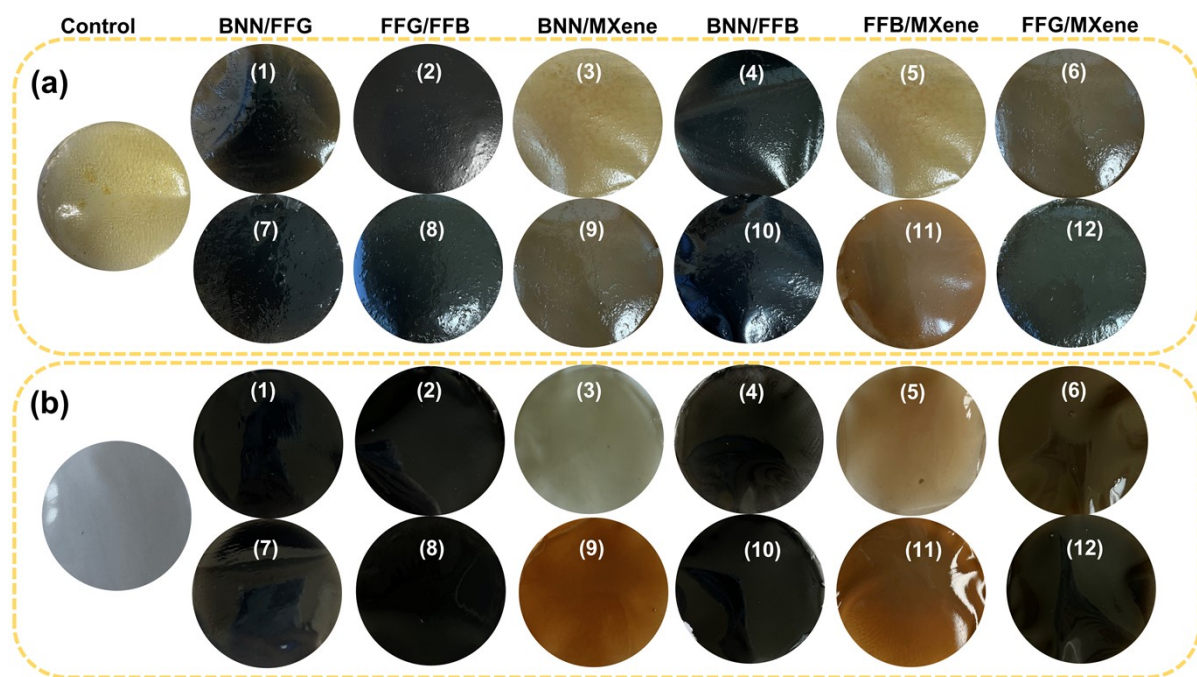

**Fig. S3.** Images of (a) chitosan films containing 1 wt% hybrids (a1-a6) and mixtures (a7-a12); (b) PVA films containing 1 wt% hybrids (b1-b6) and mixtures (b7-b12).

**Table S4.** Cost of the solvents retrieved from Sigma-Aldrich as of January 2024.

| <i>Solvent</i>        | <i>Quantity used</i> | <i>Sigma price<br/>(KRW)</i> | <i>Cost (KRW)/100ml</i> | <i>Cost (USD)/100ml<br/>(Rate 0.00076)</i> |
|-----------------------|----------------------|------------------------------|-------------------------|--------------------------------------------|
| <b>Coffee Waste</b>   | 100 ml               | 501.75/ 1000 ml              | 50.175                  | 0.038                                      |
| <b>Gallnut Powder</b> | 100 ml               | 801.75/ 1000 ml              | 80.175                  | 0.061                                      |
| <b>Acetone</b>        | 100 ml               | 71,456/500 ml                | 14,292.1                | 10.862                                     |
| <b>DMF</b>            | 100 ml               | 91,553/250 ml                | 36,624.2                | 27.834                                     |
| <b>Ethanol</b>        | 100 ml               | 103,400/1000 ml              | 10,340                  | 7.858                                      |
| <b>DMSO</b>           | 100 ml               | 581,189/1000 ml              | 58,118.9                | 44.170                                     |
| <b>IPA</b>            | 100 ml               | 80,869/500 ml                | 16,173.8                | 12.292                                     |

**Table S5.** Cost of the solvent by calculation.

|                                | <i>Quantity used</i> | <i>Price (KRW) (including power<br/>consumption)</i> | <b>In detail</b>                                                                                 |
|--------------------------------|----------------------|------------------------------------------------------|--------------------------------------------------------------------------------------------------|
| <b>Coffee Waste<br/>Powder</b> | 10 g                 | 501.75/1000 ml                                       | Electric brewing kettle power: 300 W<br>Centrifuge power: 2.7 kW<br>Electricity bills: 111.5 KRW |
| <b>Gallnut<br/>Powder</b>      | 10 g                 | 801.75/1000 ml                                       |                                                                                                  |

The life cycle assessment (LCA) has an important role in investigating the potential environmental impacts of new technologies to develop an understanding of their potential environmental burdens by considering all activities from raw material acquisition through production, use, and final disposal. Due to the complexity of the raw material and limited database resources, utilizing existing graphite and graphene databases as reference, we performed a LCA of the technology described herein including activities from raw material extraction and processing to graphene production. The functional unit is the procedure required to prepare 1 g of graphene. The system boundaries of this study represent a cradle-to-gate perspective. This process includes the first step of coffee extract preparation, the second step of sonication, centrifugation, washing, and drying to obtain graphene. The general scheme of the LCA system boundaries is shown in **Fig. S4**. The methods of IPCC 2021 GWP 100a V1.02



was considered for this LCA, and the software SimaPro was used for the calculations. We include three impact categories: energy use, biogenic, and land transformation. For all other processes, inventory data was obtained from the Ecoinvent database.

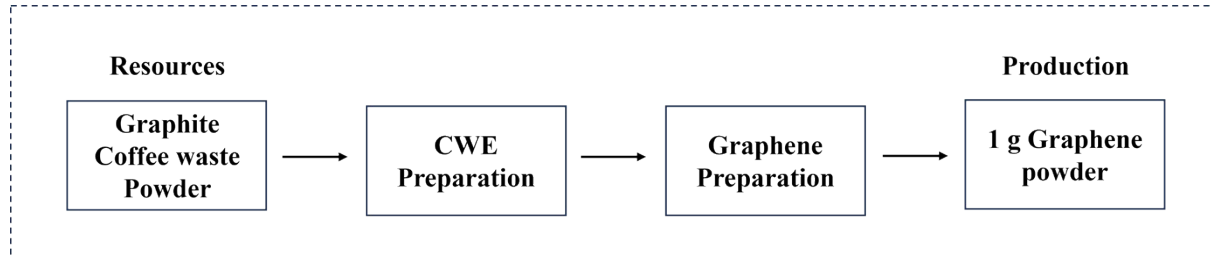

**Fig. S4.** Flowchart describing the cradle-to-gate life cycle of graphene produce.

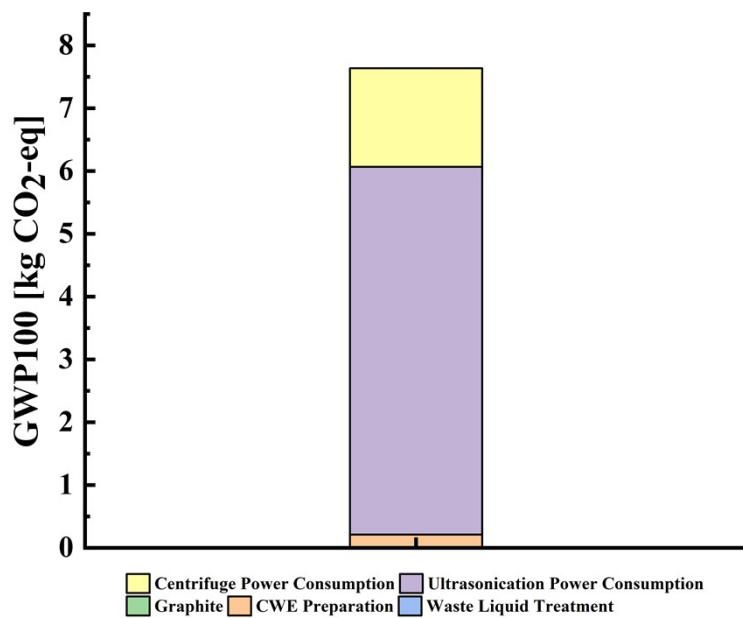

**Fig. S5.** Life cycle global warming potential of graphene production.

**Table S6.** Input data for the process.

| <b>Process1-input</b>             |          | <b>Electrical Power</b> |
|-----------------------------------|----------|-------------------------|
| Coffee Waste Powder               | 10 g     |                         |
| Distilled Water 1 L               | 1000 g   |                         |
| Electric kettle power consumption | 0.3 kWh  | 300 W                   |
| <b>Process1-output</b>            |          |                         |
| CWE                               | 1000 ml  |                         |
| <b>Process2-input</b>             |          |                         |
| CWE                               | 1000 ml  |                         |
| Graphite                          | 10 g     |                         |
| Sonication power consumption      | 8.4 kWh  | 350 W                   |
| Centrifuge consumption            | 2.25 kWh | 2.7 kW                  |
| <b>Process2-output</b>            |          |                         |
| Graphene                          | 1 g      |                         |
| Unexfoliated graphite             | 9 g      |                         |
| Solvent                           | 1000 ml  |                         |

**Table S7.** Numerical results presented for LCA analysis.

| Impact category               | Unit                   | Total       | Raw material acquisition and preparation process |             | Product Manufacturing Process     |                              | Waste disposal process |
|-------------------------------|------------------------|-------------|--------------------------------------------------|-------------|-----------------------------------|------------------------------|------------------------|
|                               |                        |             | CWE Preparation                                  | Graphite    | Ultrasonication power consumption | Centrifuge power consumption | Waste liquid treatment |
| GWP100 - fossil               | kg CO <sub>2</sub> -eq | 7.6256609   | 0.21029009                                       | 0.000715934 | 5.8479882                         | 1.5664254                    | 0.000241294            |
| GWP100 - biogenic             | kg CO <sub>2</sub> -eq | 0.007679042 | 0.000243815                                      | 6.94E-07    | 0.005839832                       | 0.001564241                  | 3.05E-05               |
| GWP100 - land transformation  | kg CO <sub>2</sub> -eq | 0.004165862 | 1.16E-04                                         | 1.36E-06    | 0.003192853                       | 8.55E-04                     | 3.13E-07               |
| <b>Total Carbon Footprint</b> |                        | 7.637505805 | 0.210650012                                      | 0.000717988 | 5.857020886                       | 1.568844869                  | 0.000272068            |
| <b>Percentage</b>             |                        | 100%        | 2.76%                                            | 0.01%       | 76.69%                            | 20.54%                       | 0.00%                  |

## References

- (1) Şenel, M. C.; Gürbüz, M. Synergistic Effect of Graphene/Boron Nitride Binary Nanoparticles on Aluminum Hybrid Composite Properties. *Adv. Compos. Hybrid Mater.* **2021**, *4* (4), 1248–1260. <https://doi.org/10.1007/s42114-021-00209-0>.
- (2) Liu, X.; Chen, S.; Zhang, Y.; Liu, M.; Emori, W.; Shao, Y. Preparation of Graphene Oxide–Boron Nitride Hybrid to Reinforce the Corrosion Protection Coating. *Corros. Rev.* **2021**, *39* (2), 123–136. <https://doi.org/10.1515/correv-2020-0051>.
- (3) Li, Y.; Lin, H.; Mehra, N. Identification of Thermal Barrier Areas in Graphene Oxide/Boron Nitride Membranes by Scanning Thermal Microscopy: Thermal Conductivity Improvement through Membrane Assembling. *ACS Appl. Nano Mater.* **2021**, *4* (4), 4189–4198. <https://doi.org/10.1021/acsnm.1c00528>.
- (4) Lee, S.; Kim, J. Incorporating MXene into Boron Nitride/Poly(Vinyl Alcohol) Composite Films to Enhance Thermal and Mechanical Properties. *Polymers* **2021**, *13* (3), 379.

<https://doi.org/10.3390/polym13030379>.

- (5) Jerome, R.; Sundramoorthy, A. K. Preparation of Hexagonal Boron Nitride Doped Graphene Film Modified Sensor for Selective Electrochemical Detection of Nicotine in Tobacco Sample. *Anal. Chim. Acta* **2020**, *1132*, 110–120. <https://doi.org/10.1016/j.aca.2020.07.060>.
- (6) Liu, Z.-J.; Yin, C.-G.; Cecen, V.; Fan, J.-C.; Shi, P.-H.; Xu, Q.-J.; Min, Y.-L. Polybenzimidazole Thermal Management Composites Containing Functionalized Boron Nitride Nanosheets and 2D Transition Metal Carbide MXenes. *Polymer* **2019**, *179*, 121613. <https://doi.org/10.1016/j.polymer.2019.121613>.
- (7) Liang, W.; Ge, X.; Ge, J.; Li, T.; Zhao, T.; Chen, X.; Zhang, M.; Ji, J.; Pang, X.; Liu, R. Three-Dimensional Heterostructured Reduced Graphene Oxide-Hexagonal Boron Nitride-Stacking Material for Silicone Thermal Grease with Enhanced Thermally Conductive Properties. *Nanomaterials* **2019**, *9* (7), 938. <https://doi.org/10.3390/nano9070938>.
- (8) Kumar Rastogi, P.; Rani Sahoo, K.; Thakur, P.; Sharma, R.; Bawari, S.; Podila, R.; N. Narayanan, T. Graphene-hBN Non-van Der Waals Vertical Heterostructures for Four- Electron Oxygen Reduction Reaction. *Phys. Chem. Chem. Phys.* **2019**, *21* (7), 3942–3953. <https://doi.org/10.1039/C8CP06155F>.
- (9) Yang, W.; Wang, N.-N.; Ping, P.; Yuen, A. C.-Y.; Li, A.; Zhu, S.-E.; Wang, L.-L.; Wu, J.; Chen, T. B.-Y.; Si, J.-Y.; Rao, B.-D.; Lu, H.-D.; Chan, Q. N.; Yeoh, G.-H. Novel 3D Network Architected Hybrid Aerogel Comprising Epoxy, Graphene, and Hydroxylated Boron Nitride Nanosheets. *ACS Appl. Mater. Interfaces* **2018**, *10* (46), 40032–40043. <https://doi.org/10.1021/acsami.8b15301>.
- (10) Zhang, J.; Lei, W.; Liu, D.; Wang, X. Synergistic Influence from the Hybridization of Boron Nitride and Graphene Oxide Nanosheets on the Thermal Conductivity and Mechanical Properties of Polymer Nanocomposites. *Compos. Sci. Technol.* **2017**, *151*, 252–257. <https://doi.org/10.1016/j.compscitech.2017.08.033>.
- (11) Singh, A. K.; Panda, B. P.; Mohanty, S.; Nayak, S. K.; Gupta, M. K. Synergistic Effect of Hybrid Graphene and Boron Nitride on the Cure Kinetics and Thermal Conductivity of Epoxy Adhesives. *Polym. Adv. Technol.* **2017**, *28* (12), 1851–1864. <https://doi.org/10.1002/pat.4072>.
- (12) Cui, X.; Ding, P.; Zhuang, N.; Shi, L.; Song, N.; Tang, S. Thermal Conductive and Mechanical Properties of Polymeric Composites Based on Solution-Exfoliated Boron Nitride and Graphene Nanosheets: A Morphology-Promoted Synergistic Effect. *ACS Appl. Mater. Interfaces* **2015**, *7* (34), 19068–19075. <https://doi.org/10.1021/acsami.5b04444>.
- (13) Long, C.; Xie, X.; Fu, J.; Wang, Q.; Guo, H.; Zeng, W.; Wei, N.; Wang, S.; Xiong, Y. Supercapacitive Brophene-Graphene Aerogel as Elastic-Electrochemical Dielectric Layer for Sensitive Pressure Sensors. *J. Colloid Interface Sci.* **2021**, *601*, 355–364. <https://doi.org/10.1016/j.jcis.2021.05.116>.
- (14) Zhou, T.; Wu, C.; Wang, Y.; Tomsia, A. P.; Li, M.; Saiz, E.; Fang, S.; Baughman, R. H.; Jiang, L.; Cheng, Q. Super-Tough MXene-Functionalized Graphene Sheets. *Nat. Commun.* **2020**, *11* (1), 2077. <https://doi.org/10.1038/s41467-020-15991-6>.
- (15) Ren, J.; Li, Q.; Yan, L.; Jia, L.; Huang, X.; Zhao, L.; Ran, Q.; Fu, M. Enhanced Thermal Conductivity of Epoxy Composites by Introducing Graphene@boron Nitride Nanosheets Hybrid

- Nanoparticles. *Mater. Des.* **2020**, *191*, 108663. <https://doi.org/10.1016/j.matdes.2020.108663>.
- (16) Huang, X.; Wu, P. A Small Amount of Delaminated Ti<sub>3</sub>C<sub>2</sub> Flakes to Greatly Enhance the Thermal Conductivity of Boron Nitride Papers by Assembling a Well-Designed Interface. *Mater. Chem. Front.* **2020**, *4* (1), 292–301. <https://doi.org/10.1039/C9QM00616H>.
- (17) Tsai, M.-H.; Tseng, I.-H.; Chiang, J.-C.; Li, J.-J. Flexible Polyimide Films Hybrid with Functionalized Boron Nitride and Graphene Oxide Simultaneously To Improve Thermal Conduction and Dimensional Stability. *ACS Appl. Mater. Interfaces* **2014**, *6* (11), 8639–8645. <https://doi.org/10.1021/am501323m>.
- (18) Li, B.; Wu, N.; Yang, Y.; Pan, F.; Wang, C.; Wang, G.; Xiao, L.; Liu, W.; Liu, J.; Zeng, Z. Graphene Oxide-Assisted Multiple Cross-Linking of MXene for Large-Area, High-Strength, Oxidation-Resistant, and Multifunctional Films. *Adv. Funct. Mater.* **2023**, *33* (11), 2213357. <https://doi.org/10.1002/adfm.202213357>.
- (19) Yin, L.; Gong, K.; Pan, H.; Guo, L.; Zhou, K. Column-to-Beam Architecture Inspires Interface-Engineered MXene Nanosheet/Boron Nitride Nanosheet/Polydopamine Hybrids for Fire Retardants. *ACS Appl. Nano Mater.* **2022**, *5* (9), 13123–13135. <https://doi.org/10.1021/acsnm.2c02902>.
- (20) Sun, Z.; Wang, D.; Lin, L.; Liu, Y.; Yuan, M.; Nan, C.; Li, H.; Sun, G.; Yang, X. Ultrathin Hexagonal Boron Nitride as a van Der Waals' Force Initiator Activated Graphene for Engineering Efficient Non-Metal Electrocatalysts of Li-CO<sub>2</sub> Battery. *Nano Res.* **2022**, *15* (2), 1171–1177. <https://doi.org/10.1007/s12274-021-3620-8>.
- (21) Saha, S.; Son, W.; Hoon Kim, N.; Hee Lee, J. Fabrication of Impermeable Dense Architecture Containing Covalently Stitched Graphene Oxide/Boron Nitride Hybrid Nanofiller Reinforced Semi-Interpenetrating Network for Hydrogen Gas Barrier Applications. *J. Mater. Chem. A* **2022**, *10* (8), 4376–4391. <https://doi.org/10.1039/D1TA09486F>.
- (22) Deng, B.; Shi, Y.; Zhang, X.; Ma, W.; Liu, H.; Gong, C. Thermally Conductive and Electrically Insulated Silicone Rubber Composites Incorporated with Boron Nitride–Multilayer Graphene Hybrid Nanofiller. *Nanomaterials* **2022**, *12* (14), 2335. <https://doi.org/10.3390/nano12142335>.
- (23) Wang, S.; Sun, X.; Xu, F.; Yang, M.; Yin, W.; Li, J.; Li, Y. Strong yet Tough Graphene/Graphene Oxide Hybrid Films. *Carbon* **2021**, *179*, 469–476. <https://doi.org/10.1016/j.carbon.2021.04.052>.
- (24) Soong, Y.-C.; Li, J.-W.; Chen, Y.-F.; Chen, J.-X.; Lee Sanchez, W. A.; Tsai, W.-Y.; Chou, T.-Y.; Cheng, C.-C.; Chiu, C.-W. Polymer-Assisted Dispersion of Boron Nitride/Graphene in a Thermoplastic Polyurethane Hybrid for Cooled Smart Clothes. *ACS Omega* **2021**, *6* (43), 28779–28787. <https://doi.org/10.1021/acsomega.1c03496>.
- (25) Deshmukh, A. R.; Chaturvedi, P. K.; Lee, S.-Y.; Park, W.-Y.; Kim, B. S. One-Step Green Production of Biocompatible Functionalized Few-Layer Graphene/Boron Nitride Nanosheet Hybrids Using Tannic Acid-Based Liquid-Phase Exfoliation. *ACS Sustain. Chem. Eng.* **2022**, *10* (29), 9573–9583. <https://doi.org/10.1021/acssuschemeng.2c02484>.
- (26) Occhiuzzi, J.; Politano, G. G.; D'Olimpio, G.; Politano, A. The Quest for Green Solvents for the Sustainable Production of Nanosheets of Two-Dimensional (2D) Materials, a Key Issue in the

- Roadmap for the Ecology Transition in the Flatland. *Molecules* **2023**, *28* (3), 1484. <https://doi.org/10.3390/molecules28031484>.
- (27) Paolucci, V.; D'Olimpio, G.; Lozzi, L.; Mio, A. M.; Ottaviano, L.; Nardone, M.; Nicotra, G.; Le-Cornec, P.; Cantalini, C.; Politano, A. Sustainable Liquid-Phase Exfoliation of Layered Materials with Nontoxic Polarclean Solvent. *ACS Sustain. Chem. Eng.* **2020**, *8* (51), 18830–18840. <https://doi.org/10.1021/acssuschemeng.0c04191>.
- (28) D'Olimpio, G.; Occhiuzzi, J.; Lozzi, L.; Ottaviano, L.; Politano, A. Dimethyl 2-Methylglutarate (Iris): A Green Platform for Efficient Liquid-Phase Exfoliation of 2D Materials. *Adv. Sustain. Syst.* **2022**, *6* (11), 2200277. <https://doi.org/10.1002/adsu.202200277>.
